# Supplementary material
Source: publisher site journal article supplement (https://www.spandidos-publications.com/4739/downloadSupplementary)
Supplement: Supplementary file 1 [file downloadSupplementary]

## Sheet: Supplementary Table 5
Table SV. Immune cell infiltration and immune scores generated by xCell from TARGET.
Cell type	AE251.HuEx.1_0.st.v2.01.1_.PAUUML.01A.01R..CEL	Y690.HuEx.1_0.st.v2.01.1_.0A4HX8.01A.01R..CEL	X004.HuEx.1_0.st.v2.01.1_.PALWWX01A01R..CEL	AE255.HuEx.1_0.st.v2.01.1_.PAVALD.01A.01R..CEL	Y705.HuEx.1_0.st.v2.01.1_.0A4I4E.01A.01R..CEL	W991.HuEx.1_0.st.v2.01.1_.PARBGW01A01R..CEL	Y719.HuEx.1_0.st.v2.01.1_.PATUXZ..CEL	Y712.HuEx.1_0.st.v2.01.1_.0A4HLD.01A.01R..CEL	AE248.HuEx.1_0.st.v2.01.1_.PATKSS.01A.01R..CEL	W993.HuEx.1_0.st.v2.01.1_.PAPKWD01A01R..CEL	Y699.HuEx.1_0.st.v2.01.1_.0A4I3S.01A.01R..CEL	W994.HuEx.1_0.st.v2.01.1_.PAPVYW01A01R..CEL	W982.HuEx.1_0.st.v2.01.1_.PAMLKS01A01R..CEL	X009.HuEx.1_0.st.v2.01.1_.PALKDP01A01R..CEL	Y701.HuEx.1_0.st.v2.01.1_.0A4I42.01A.01R..CEL	W986.HuEx.1_0.st.v2.01.1_.PARJXU01A01R..CEL	W983.HuEx.1_0.st.v2.01.1_.PARDAX01A01R..CEL	X003.HuEx.1_0.st.v2.01.1_.PANXSC01A01R..CEL	Y715.HuEx.1_0.st.v2.01.1_.0A4HY5.01A.01R..CEL	W995.HuEx.1_0.st.v2.01.1_.PAPWWC01A01R..CEL	Y706.HuEx.1_0.st.v2.01.1_.0A4I65.01A.01R..CEL	W965.HuEx.1_0.st.v2.01.1_.PAPNVD01A01R..CEL	W980.HuEx.1_0.st.v2.01.1_.PAKXLD01A01R..CEL	W996.HuEx.1_0.st.v2.01.1_.PAMTCM01A01R..CEL	W969.HuEx.1_0.st.v2.01.1_.PASKZZ01A01R..CEL	Y683.HuEx.1_0.st.v2.01.1_.PALECC..CEL	X007.HuEx.1_0.st.v2.01.1_.PAKFVX01A01R..CEL	W981.HuEx.1_0.st.v2.01.1_.PAMEKS01A01R..CEL	W987.HuEx.1_0.st.v2.01.1_.PARKAF01A01R..CEL	W970.HuEx.1_0.st.v2.01.1_.PASSLM01A01R..CEL	AE254.HuEx.1_0.st.v2.01.1_.PAUYTT.01A.01R..CEL	W971.HuEx.1_0.st.v2.01.1_.PASEFS01A01R..CEL	AE252.HuEx.1_0.st.v2.01.1_.PAUVUL.01A.01R..CEL	W985.HuEx.1_0.st.v2.01.1_.PARGTM01A01R..CEL	W978.HuEx.1_0.st.v2.01.1_.PATAWV01A01R..CEL	W972.HuEx.1_0.st.v2.01.1_.PANVJJ01A01R..CEL	X005.HuEx.1_0.st.v2.01.1_.PALZGU01A01R..CEL	AE253.HuEx.1_0.st.v2.01.1_.PAUXPZ.01A.01R..CEL	AE259.HuEx.1_0.st.v2.01.1_.PAUBIT.01A.01R..CEL	AE258.HuEx.1_0.st.v2.01.1_.PAVECB.01A.01R..CEL	X000.HuEx.1_0.st.v2.01.1_.PAMYYJ01A01R..CEL	W990.HuEx.1_0.st.v2.01.1_.PANZZJ01A01R..CEL	Y686.HuEx.1_0.st.v2.01.1_.PASNZV..CEL	X006.HuEx.1_0.st.v2.01.1_.PALHRL01A01R..CEL	Y713.HuEx.1_0.st.v2.01.1_.PATMXR..CEL	Y692.HuEx.1_0.st.v2.01.1_.0A4HXS.01A.01R..CEL	X002.HuEx.1_0.st.v2.01.1_.PANSEN01A01R..CEL	AE260.HuEx.1_0.st.v2.01.1_.PATXFN.01A.01R..CEL	W976.HuEx.1_0.st.v2.01.1_.PAMRHD01A01R..CEL
Adipocytes	0	0	0.0014	0	0	0	0	0	0	0	0	0	0	0	0	0.0083	0	0.0004	0	0	0	0	0	0	0.0093	0	0	0.0024	0	0	0.0009	0.0003	0	0	0.0081	0.0075	0	0	0.003	0.0055	0	0	0	0	0	0	0.003	0	0.0037
Astrocytes	0	0	0	0	0	0	0	0	0	0	0	0	0	0	0	0	0	0	0	0	0	0	0	0	0	0	0	0	0	0	0	0	0	0	0	0	0	0	0	0	0	0	0	0	0	0	0	0	0
B-cells	0	0	0.0069	0	0	0	0	0	0	0	0	0	0.0233	0	0	0	0	0.0161	0.002	0.0061	0	0	0	0	0	0	0	0	0	0.001	0	0	0	0.0093	0	0.0056	0	0	0.0048	0	0	0	0.0029	0	0	0.0013	0	0	0
Basophils	0.0523	0	0.0233	0	0	0.0624	0.0773	0.5193	0.0566	0.0762	0	0.2693	0.035	0.1428	0.2048	0.1381	0.0357	0.1113	0.0351	0.0849	0	0.2107	0.0975	0.0381	0.2261	0.0459	0.2205	0	0.0237	0.0599	0.1125	0.1543	0.3022	0.0111	0.3158	0.0028	0.0097	0.0995	0.1911	0	0.0237	0.0015	0.016	0.2577	0.0379	0.0074	0.0521	0.1919	0.1892
CD4+ T-cells	0	0	0	0.0026	0	0	0	0	0	0	0	0	0	0	0	0	0	0	0	0	0	0	0	0	0	0	0	0	0	0	0	0	0	0	0	0	0	0	0	0	0	0	0	0	0	0	0	0	0
CD4+ Tcm	0	0	0	0	0	0.0133	0.0029	0	0	0	0	0.028	0	0	0	0	0.0083	0.0105	0	0	0	0.0113	0.0114	0	0.0083	0	0	0	0	0	0	0.0281	0	0	0.0076	0	0	0.0062	0	0	0	0	0	0	0.0059	0	0	0.0539	0.0245
CD4+ Tem	0	0	0.003	0	0	0.0609	0.0223	0	0	0.0279	0	0.0032	0	0	0	0.0374	0.0341	0.0251	0	0.0303	0	0.04	0.028	0	0.0028	0.0189	0.0051	0	0.0274	0.0346	0.0211	0.0033	0.0256	0.0597	0.0444	0	0.0462	0.0202	0.0516	0	0	0.0229	0.0497	0	0.0095	0	0	0.0312	0.0345
CD4+ memory T-cells	0.0207	0.0403	0.0337	0.0258	0.0178	0.0104	0.0274	0	0.0129	0.015	0.0174	0	0.0464	0.0344	0.0245	0.0121	0.0164	0.0256	0.0325	0.0328	0.0287	0	0	0.0149	0	0.0155	0.0125	0.0197	0.0341	0.047	0.0093	0	0	0.0395	0	0.0106	0.0526	0.0039	0	0.0097	0.0311	0.0215	0.0569	0.048	0.0184	0.0303	0.0013	0	0
CD4+ naive T-cells	0	0	0	0	0	0	0	0	0	0	0	0	0	0	0	0	0	0	0	0	0	0	0	0	0	0	0	0	0	0	0	0	0	0	0	0	0	0	0	0	0	0	0	0	0	0	0	0	0
CD8+ T-cells	0	0.0136	0.0019	0	0	0	0	0	0	0	0	0	0	0	0	0	0	0.0024	0.0043	0	0	0	0	0	0	0	0	0	0	0	0	0	0	0	0	0.0066	0	0	0	0	0	0	0	0	0	0.0124	0	0	0
CD8+ Tcm	0	0.0153	0	0	0	0	0	0	0	0	0	0	0	0	0	0	0	0	0	0	0	0	0	0	0	0	0	0	0	0	0	0	0	0	0	0	0.016	0	0	0	0	0.002	0.0027	0	0	0.0125	0	0	0
CD8+ Tem	0	0	0	0	0	0	0	0	0	0	0	0	0	0	0	0	0	0	0	0	0	0	0	0	0	0	0	0	0	0	0	0	0	0	0	0	0.0061	0	0	0	0	0	0	0	0	0	0	0	0
CD8+ naive T-cells	0.0071	0.0094	0.0057	0.0268	0.0155	0.0003	0.0061	0	0.0008	0	0.0214	0	0.0068	0	0	0	0.0064	0	0.0113	0	0.0275	0	0	0	0	0.006	0	0.0089	0	0.0112	0	0.0006	0	0.0036	0	0.001	0.0028	0.001	0	0.0062	0.0187	0.0143	0.0075	0	0.0199	0.0104	0	0	0
CLP	0.0887	0.0647	0.0227	0.1087	0.0745	0.0309	0.0419	0	0.0314	0.058	0.0903	0.0442	0.0991	0.0159	0.0572	0.0541	0.0114	0.0008	0.0641	0.0624	0.0783	0.0323	0.0178	0.0337	0.0004	0.037	0.0287	0.0413	0.035	0.077	0.0278	0.0037	0.025	0.0549	0.0146	0.024	0.0532	0.0125	0.0051	0.036	0.0211	0.022	0.0433	0.0565	0.0254	0.0714	0.027	0.0124	0
CMP	0	0	0	0	0	0	0	0	0	0	0	0.0024	0	0	0	0	0	0	0	0	0	0	0	0	0.0179	0	0	0	0	0	0.0051	0	0	0	0	0	0	0	0	0	0	0	0	0	0	0	0	0.0044	0.0004
Chondrocytes	0.2127	0.0137	0.0106	0.0992	0.2016	0	0	0	0.0051	0	0.1947	0	0	0	0	0.1269	0	0	0.1232	0	0.0991	0	0.1044	0.0451	0.2043	0.0071	0	0.0002	0.0136	0.0767	0.1009	0.0393	0	0	0.0566	0.0766	0	0.0215	0.0703	0.1698	0.0431	0.1069	0	0	0.0017	0.0542	0.1533	0.1771	0.0175
Class-switched memory B-cells	0	0	0.002	0.004	0	0.0211	0.0032	0.0442	0.0005	0.0075	0	0.0429	0.0196	0.0009	0	0.0092	0.0059	0.0161	0.0042	0	0	0.0279	0.0297	0.0164	0.0316	0.0078	0.0038	0	0	0.0067	0	0.0322	0.0281	0.0048	0.0287	0.0028	0	0.0148	0.0158	0	0	0	0.001	0	0.003	0	0.0035	0.0474	0.0288
DC	0	0	0	0	0	0	0	0.0636	0	0	0	0.0174	0	0	0	0	0	0.0104	0	0	0	0	0.0008	0.0025	0	0	0	0	0	0	0	0	0.0061	0	0	0	0	0	0.006	0	0.0231	0	0	0	0.0002	0.0012	0	0.0051	0.0004
Endothelial cells	0.0093	0.0135	0.0273	0	0.0685	0.1633	0.0553	0.0177	0.0049	0.0266	0	0.0479	0.0147	0.0556	0.0479	0.0424	0.0666	0.1046	0.0144	0.0893	0.0192	0.1229	0.0642	0.008	0.0764	0.092	0.0591	0.0729	0.066	0.0019	0.0997	0.0536	0.0578	0.029	0.0545	0.0278	0.1153	0.0683	0.0238	0.0479	0.0407	0.061	0.0434	0.0224	0.0799	0.013	0.0284	0.0803	0.1776
Eosinophils	0	0	0	0	0	0	0	0.0107	0	0	0	0.0034	0	0	0	0	0	0	0	0	0	0.0068	0.0119	0	0.0209	0	0	0	0	0	0	0.0139	0	0	0.0195	0	0	0.0061	0.0126	0	0	0	0	0	0	0	0	0.0291	0.0405
Epithelial cells	0	0	0.0025	0	0	0.0043	0	0.0318	0.0023	0.0022	0	0.0201	0.0002	0	0	0	0.0024	0.0006	0.0009	0	0	0.0194	0.031	0.0015	0.0172	0.0064	0	0.0007	0	0	0	0.0104	0.0081	0.0009	0.0199	0	0.0003	0.0059	0.0038	0.0018	0	0.0002	0	0	0.0025	0	0.0006	0.0246	0.0155
Erythrocytes	0	0	0	0	0	0	0	0	0	0	0	0	0	0	0	0	0	0	0	0	0	0	0	0	0	0	0	0	0	0	0	0	0	0	0	0	0	0	0	0	0	0	0	0	0	0	0	0	0
Fibroblasts	0	0	0	0	0	0	0	0	0	0	0	0	0	0	0	0.0543	0	0	0	0	0	0	0	0	0.0507	0	0	0.0093	0	0	0	0	0	0	0.0379	0.0451	0	0	0.1642	0.0368	0.0404	0	0	0	0	0	0.024	0	0
GMP	0	0	0	0	0	0	0	0	0	0	0	0	0	0	0	0	0	0	0	0	0	0	0	0	0	0	0	0	0	0	0	0	0	0	0	0	0	0	0	0	0	0	0	0	0	0	0	0	0
HSC	0.0904	0.0914	0.0495	0.0025	0.3068	0.0914	0.0615	0.1233	0.009	0.008	0.3184	0.0897	0	0.0649	0.0478	0.0318	0.1308	0.0871	0	0.0889	0.1644	0.0496	0.1668	0.0729	0.1345	0.0886	0.0113	0.1015	0.0796	0.0116	0.1054	0.1771	0.0328	0.0217	0.0447	0.0949	0.1171	0.088	0.0628	0.2082	0.1654	0.1646	0.0572	0.0216	0.1766	0.0539	0.0768	0.1742	0.1424
Hepatocytes	0	0	0	0	0	0	0	0.0109	0	0	0	0.0048	0	0	0	0	0	0	0	0	0	0.0006	0.0011	0	0	0	0	0	0	0	0	0.0023	0.0021	0	0.005	0	0	0	0	0	0	0	0	0	0	0	0	0.0044	0.0039
Keratinocytes	0	0	0	0	0.0001	0	0	0.0083	0	0	0	0.0021	0	0	0	0	0	0	0.0013	0	0	0.0005	0.0032	0.0022	0.0012	0.0002	0	0	0	0	0	0.005	0	0	0.0049	0	0.0002	0.0004	0	0.0002	0	0	0	0	0	0	0	0.0083	0.0013
MEP	0.0024	0.0179	0.0008	0.0254	0.011	0.0038	0	0	0.0033	0.0285	0.019	0.0213	0.0536	0	0	0	0.0241	0	0.0271	0	0.0207	0.0347	0.01	0.0272	0	0.0045	0	0.0027	0.0035	0.0052	0	0.0289	0	0.0182	0	0.0005	0.0208	0	0.0013	0	0.0276	0.0265	0.0098	0.0014	0.0114	0.0036	0.011	0	0
MPP	0	0	0	0	0	0	0	0	0	0	0	0	0	0	0	0	0	0	0	0	0	0	0	0	0	0	0	0	0	0	0	0	0	0	0	0	0	0	0	0	0	0	0	0	0	0	0	0	0
MSC	0.0146	0	0.0223	0	0	0.1395	0	0.3723	0.1285	0.0425	0	0.2545	0.0505	0	0	0.0702	0.0603	0.0666	0	0.1939	0	0.234	0.4396	0.0082	0.4205	0.0773	0.0164	0.0714	0	0	0.2134	0.0631	0.2568	0	0.271	0.0412	0.0357	0.2959	0.2892	0.1813	0	0.0909	0	0	0.0267	0	0	0.4122	0.2515
Macrophages	0	0.0054	0.0701	0	0	0.0504	0.0106	0.0007	0	0.0135	0	0	0.0117	0	0.0228	0.0013	0.0218	0.0879	0.0155	0.0343	0.0342	0	0	0	0.0251	0.0646	0.0378	0.0071	0.0429	0.0059	0	0	0.0418	0.046	0	0.0354	0.0426	0.0092	0.0564	0.0274	0.0517	0.0604	0.078	0.045	0.033	0.0477	0.0371	0	0.0451
Macrophages M1	0.0019	0.0006	0.039	0	0	0.0311	0.0162	0.0039	0	0.0078	0.0006	0.008	0.0021	0.0035	0.0043	0.0032	0.016	0.0524	0.0213	0.0063	0.0112	0.0041	0.006	0	0.0219	0.0237	0.0142	0	0.0262	0.0011	0	0	0.0363	0.0147	0.0139	0.0249	0.0397	0.0037	0.0389	0.0109	0.0149	0.0433	0.0521	0.0282	0.018	0.0354	0.0261	0.0044	0.035
Macrophages M2	0	0.0004	0.028	0	0	0.0104	0.0018	0.0065	0	0	0	0.0107	0.0115	0.004	0.0164	0.0056	0.0053	0.0297	0	0.0042	0.0146	0.008	0.0029	0	0.0146	0.0117	0.0029	0.0038	0.0003	0.0011	0	0	0	0.0119	0.02	0.0193	0.0097	0.0048	0.0293	0.0073	0.0229	0.0115	0.0174	0.0044	0.0099	0.0227	0.0229	0.0199	0.0216
Mast cells	0.0013	0.0105	0.0069	0.0063	0	0.0068	0.0074	0.0033	0.0041	0.0135	0	0.0077	0.0053	0.0024	0	0	0.006	0.0121	0.0023	0.004	0	0.0043	0	0.0036	0	0.0073	0.0095	0.0006	0.0047	0.0073	0.0002	0.002	0.0032	0.0139	0.0027	0.0009	0.0064	0.003	0.0015	0	0.0043	0.0098	0.0069	0.0052	0	0.0023	0.0039	0	0.0084
Megakaryocytes	0	0.0006	0	0.0002	0.0018	0.0012	0	0.0039	0	0	0.0003	0	0	0	0	0	0.0008	0.0013	0	0	0.0003	0.0016	0.0017	0	0	0.0011	0	0.0016	0	0	0	0.0005	0	0.0002	0.0024	0.0002	0.001	0	0	0.0003	0.0004	0.0007	0	0	0.0016	0.0001	0	0.0049	0.0016
Melanocytes	0.0015	0	0.0046	0	0	0.0062	0	0.0047	0.006	0	0	0.004	0	0	0.0016	0.0031	0.0037	0.0011	0	0.0024	0	0.0014	0.0032	0.001	0.0038	0.0055	0.002	0.0001	0	0	0.002	0	0.0031	0	0.0015	0.0013	0.0027	0.0047	0.0111	0.0013	0	0.0039	0	0	0.0007	0	0.0016	0.0119	0.005
Memory B-cells	0	0	0.0093	0	0	0.0002	0	0.0527	0	0.0024	0	0.0048	0.0001	0	0	0	0	0	0.0104	0	0	0.0091	0	0	0	0	0.0047	0	0	0.0024	0	0.0165	0.0133	0	0.0105	0	0	0	0.0037	0	0	0	0	0	0	0	0	0.014	0
Mesangial cells	0	0	0	0	0	0	0	0.0335	0	0	0	0.0061	0	0	0	0.0089	0	0	0	0	0	0.0359	0	0.0066	0.0115	0	0	0	0	0	0	0.0395	0	0	0.0305	0	0	0.005	0.0096	0	0	0	0	0	0	0	0.0032	0.0431	0.03
Monocytes	0	0	0.0232	0	0	0.0081	0	0	0	0	0	0	0	0	0	0	0	0.0215	0.0028	0	0	0	0	0	0.0038	0.009	0	0	0	0	0	0	0	0	0	0.005	0.0109	0	0.0022	0	0	0.0312	0.0111	0	0	0.0045	0.0038	0	0.0086
Myocytes	0	0	0	0	0.0467	0.0059	0.0214	0.0115	0	0.0038	0.0025	0.0197	0.0103	0	0.0036	0	0.0106	0	0.0486	0.0096	0	0	0.0043	0	0	0.0046	0.007	0	0.0032	0.0183	0.0006	0.1983	0.0116	0.0012	0.1286	0	0.0001	0.0069	0.0188	0.0001	0.0944	0	0.0011	0	0.0811	0.093	0	0.007	0.0017
NK cells	0	0	0	0	0	0	0	0	0	0	0	0	0	0	0	0	0	0	0	0	0	0	0	0	0	0	0	0	0	0	0	0	0	0	0	0	0	0	0	0	0	0	0	0	0	0	0	0	0
NKT	0.0034	0	0.0059	0	0.004	0.0449	0.0396	0.0454	0.0014	0.0303	0	0.0691	0.0315	0	0.0475	0.014	0.0094	0.0072	0	0.0045	0	0.0911	0.0505	0.0114	0.0759	0.0316	0	0.0035	0.041	0.0331	0.0145	0.1497	0.0539	0.0283	0.1536	0.0129	0.0113	0.0334	0.068	0.0165	0	0.0169	0.0161	0	0.0379	0	0.0518	0.1104	0.0688
Neurons	0.0004	0.0033	0.0011	0.0005	0.0017	0.0016	0.0028	0.0065	0.0024	0.0008	0.0035	0.0055	0.0007	0.0007	0.0024	0.0021	0.0007	0.0027	0	0.0005	0.0001	0.0079	0.004	0.0029	0.0065	0.0004	0	0.0001	0.0005	0.0014	0.0042	0.025	0.0009	0.0008	0.005	0	0	0.0009	0.0042	0.0015	0	0.0005	0.0004	0.001	0.0012	0.0005	0.0013	0.0104	0.0042
Neutrophils	0	0	0.0082	0	0	0.0058	0	0.0017	0	0	0	0.0022	0	0	0	0	0.0036	0.0049	0.006	0	0	0	0	0	0	0.0018	0	0.0026	0.0009	0	0	0	0.0009	0	0	0.0038	0.0017	0	0.0001	0	0.0007	0	0.0052	0	0.0034	0.0027	0.0008	0	0
Osteoblast	0.0547	0	0.0509	0.0452	0.0544	0.0359	0.0657	0	0.0369	0.0623	0	0	0.1306	0.1187	0.0547	0.0263	0.0586	0.0502	0.0349	0.0469	0.1204	0.022	0	0.083	0	0.0234	0.0712	0.0274	0.1063	0.0337	0.0546	0	0.0077	0.0712	0.0396	0.0475	0.1442	0.004	0	0.0303	0.0745	0.0757	0.0708	0.0717	0.0026	0.0406	0.0586	0	0
Pericytes	0	0	0	0	0	0.032	0.006	0.0536	0	0	0	0.0423	0	0	0	0	0	0.0209	0	0	0	0.0316	0.0321	0	0.06	0	0	0	0	0	0.062	0.0446	0.0194	0	0.0487	0	0	0	0	0	0	0	0	0	0	0	0	0.1085	0.0867
Plasma cells	0.0113	0.0173	0.0047	0.0125	0	0.0296	0.0157	0.0232	0.0122	0.0216	0.0018	0.0279	0.0205	0.015	0.0319	0.0003	0.0265	0.0039	0.0085	0.0022	0.0051	0.0042	0.0271	0.0083	0.0134	0.0148	0.0124	0.0072	0.0239	0.0079	0.0088	0.0118	0.0242	0.0113	0.0173	0.0043	0.0111	0.0315	0.0143	0.0242	0.0239	0.0191	0.0154	0.0036	0.0141	0.0192	0.0084	0.0336	0.0298
Platelets	0	0	0	0	0	0	0	0	0	0	0	0	0	0	0	0	0	0	0	0	0	0	0	0	0	0	0	0	0	0	0	0	0	0	0	0	0	0	0	0	0	0	0	0	0	0	0	0	0
Preadipocytes	0	0	0	0	0	0	0	0	0	0	0	0.0085	0	0	0	0	0	0	0	0	0	0	0	0	0	0	0	0	0	0	0	0	0	0	0	0	0	0	0	0	0	0	0	0	0	0	0	0	0
Sebocytes	0	0	0	0	0	0.0003	0	0.0096	0.0001	0.0001	0	0.0034	0	0	0	0	0.0001	0	0.0051	0	0	0.0024	0.0033	0	0.0027	0.0001	0	0	0	0	0.0003	0.0002	0.0008	0	0.0045	0	0	0.0008	0.0021	0	0	0	0	0	0.0003	0	0.0005	0.0051	0.0026
Skeletal muscle	0	0	0	0	0.0222	0	0	0.0179	0	0	0	0.0197	0	0	0	0	0	0	0	0	0	0.005	0.004	0	0.0016	0	0	0	0	0	0	0.2215	0.007	0	0.1644	0	0	0	0.0029	0	0.0598	0	0	0	0.0708	0.0385	0	0.0216	0.0193
Smooth muscle	0.3961	0.404	0.4068	0.5035	0.4284	0.2284	0.3471	0	0.4261	0.3183	0.4564	0.1052	0.4579	0.3459	0.4068	0.3087	0.3326	0.228	0.3657	0.286	0.3881	0	0.1114	0.3671	0.046	0.3302	0.2986	0.5015	0.3507	0.4052	0.2641	0.1328	0.1794	0.4082	0.0087	0.4661	0.2606	0.158	0.1609	0.4329	0.2921	0.3757	0.3343	0.4139	0.2492	0.4055	0.3679	0	0
Tgd cells	0	0	0	0	0	0	0	0	0	0	0	0	0	0	0	0	0	0	0	0	0	0	0	0	0	0	0	0	0	0	0	0	0	0	0	0	0	0	0	0	0	0	0	0	0	0	0	0	0
Th1 cells	0	0	0	0	0	0.0045	0	0	0	0.0249	0	0.0538	0.0278	0	0	0.0001	0	0	0.0156	0	0	0.0669	0.0466	0.0415	0.001	0	0	0	0.005	0.008	0.0053	0.0356	0	0	0.0388	0	0	0	0	0	0	0	0	0.0285	0	0	0	0.0021	0.0027
Th2 cells	0.1772	0.1056	0.1682	0.2289	0.0691	0.0164	0.0648	0.0574	0.2124	0.1425	0.1732	0.0744	0.2735	0.1962	0.035	0.0672	0.1614	0.0538	0.1388	0.0708	0.1623	0	0	0.0852	0	0.04	0.0778	0.2282	0.0842	0.0777	0.0805	0	0.1543	0.1163	0	0.1276	0.1535	0.0798	0.0955	0.0894	0.1072	0.1171	0.1304	0.1785	0.1367	0.0411	0.0839	0	0
Tregs	0	0	0.0034	0	0	0	0	0	0	0	0	0	0	0	0	0	0	0.0087	0	0	0	0	0.0007	0.0117	0	0	0	0	0	0	0	0	0	0	0	0	0	0	0.0024	0	0	0	0	0	0	0.0052	0.0087	0	0
aDC	0.0007	0	0.0668	0	0	0.1367	0.0107	0.0435	0	0.0061	0.004	0.0593	0.0288	0	0.0078	0.0084	0.0549	0.1041	0.0228	0.0385	0	0.0458	0.0174	0	0.0669	0.0307	0	0.0228	0	0	0.0099	0	0.1208	0	0.0162	0.0654	0.0992	0	0.0755	0.0352	0	0.0784	0.1615	0.0551	0.0518	0.0759	0.0625	0.0636	0.105
cDC	0.0025	0.0153	0.01	0	0	0.0665	0	0.3029	0.0071	0	0.0069	0.0944	0	0	0	0.0168	0.0336	0.1116	0.0135	0	0.0051	0.0145	0.0074	0.0045	0.0013	0.0355	0	0.0049	0.0249	0.0213	0.0091	0.0028	0.0849	0.0051	0.0058	0.0109	0.01	0.0072	0.0065	0.0182	0.0231	0.0134	0.0346	0	0.0503	0.0146	0	0.0956	0.0228
iDC	0.0003	0.0826	0.0564	0.0656	0.0105	0	0.009	0.6434	0.0122	0	0.0507	0.1311	0	0.0355	0	0.0869	0.0311	0.2412	0.0547	0.0126	0.0753	0.039	0.0986	0.1437	0.0667	0.0708	0.0278	0.0123	0.0256	0.048	0.0006	0.0639	0.1174	0.0541	0.1621	0.0201	0	0	0.2143	0	0.4918	0.0504	0	0.0942	0.0448	0.0959	0.0059	0.103	0.0342
ly Endothelial cells	0.0008	0.0039	0.0021	0	0.0183	0.0629	0.0094	0.0266	0	0.0078	0.0006	0.0288	0.0037	0.0153	0.0118	0.0173	0.0221	0.0291	0.0039	0.0246	0.0021	0.0645	0.0229	0.0027	0.0417	0.0317	0.0161	0.0217	0.0134	0.0001	0.0359	0.0259	0.0247	0.0062	0.0316	0.0082	0.039	0.0257	0.0084	0.0175	0.0111	0.0143	0.0086	0.0034	0.0302	0.0038	0.0038	0.0599	0.089
mv Endothelial cells	0	0	0.0095	0	0.02	0.0743	0.022	0.0417	0	0.0072	0.0009	0.0257	0.0058	0.0221	0.0116	0.0212	0.0284	0.0568	0.0002	0.038	0.0041	0.0801	0.0302	0.0025	0.0474	0.0406	0.0218	0.0291	0.0225	0	0.0482	0.033	0.036	0.0118	0.047	0.0126	0.0556	0.0292	0.0254	0.0382	0.0186	0.0233	0.0125	0.0096	0.0252	0.0011	0.0103	0.0537	0.091
naive B-cells	0	0	0	0	0	0	0	0	0	0	0	0	0	0	0	0	0	0	0	0	0	0	0	0	0	0	0.0021	0	0	0.0003	0	0	0	0	0	0	0	0	0	0	0	0	0	0	0	0	0	0	0
pDC	0	0	0	0.0003	0	0.0075	0	0.0895	0	0.0045	0	0.0154	0.0128	0	0	0	0.0022	0.0231	0.0027	0	0	0.0101	0	0.0022	0.0083	0.0157	0.0053	0	0	0	0.0035	0.0054	0.0047	0.0087	0.0209	0.0041	0.0027	0.0008	0.0432	0	0.0424	0	0.0088	0	0.0021	0.0051	0	0.0169	0.0193
pro B-cells	0	0	0	0.0002	0	0	0	0.0712	0.0054	0.0139	0	0.0454	0.0142	0	0	0.0018	0	0	0.0045	0	0	0.0373	0	0.0027	0.0131	0	0.0066	0	0	0.0025	0.0016	0.0044	0.0286	0.0034	0.0515	0	0	0	0.0198	0	0	0	0	0.0039	0	0	0	0.0262	0.0058
ImmuneScore	0.0009	0.0197	0.0781	0.0059	0	0.0474	0.012	0.0533	0.0027	0.018	0	0.0205	0.0269	0.0016	0.0152	0.0009	0.0209	0.1035	0.0219	0.0296	0.0228	0.0074	0.0085	0.0041	0.0332	0.0551	0.0315	0.0069	0.0323	0.0095	0.0001	0.0106	0.0347	0.0461	0.0148	0.0382	0.0411	0.0122	0.0557	0.0183	0.0532	0.0676	0.0694	0.0335	0.0244	0.0481	0.0304	0.0228	0.0687
StromaScore	0.0046	0.0068	0.0144	0	0.0342	0.0816	0.0276	0.0088	0.0024	0.0133	0	0.024	0.0074	0.0278	0.024	0.0525	0.0333	0.0525	0.0072	0.0446	0.0096	0.0614	0.0321	0.004	0.0682	0.046	0.0296	0.0423	0.033	0.001	0.0503	0.027	0.0289	0.0145	0.0503	0.0402	0.0576	0.0342	0.0955	0.0451	0.0406	0.0305	0.0217	0.0112	0.04	0.0065	0.0277	0.0402	0.0907
MicroenvironmentScore	0.0055	0.0264	0.0925	0.0059	0.0342	0.129	0.0397	0.0622	0.0052	0.0313	0	0.0444	0.0342	0.0294	0.0392	0.0534	0.0542	0.156	0.0291	0.0742	0.0324	0.0688	0.0406	0.0081	0.1014	0.1011	0.0611	0.0492	0.0653	0.0104	0.0504	0.0376	0.0636	0.0606	0.065	0.0784	0.0987	0.0464	0.1512	0.0634	0.0938	0.0981	0.0911	0.0447	0.0644	0.0546	0.0581	0.063	0.1593
TARGET, Therapeutically Applicable Research To Generate Effective Treatments database.
[truncated: 40 more columns]
